# Supplementary material
Source: publisher site journal article supplement (https://vertebrate-zoology.arphahub.com/article/90979/download/suppl/36/)
Supplement: Supplementary file 1

## Sheet: Sheet1
Table S5. Uncorrected pairwsise genetic distances (p-distances) in the ND2 gene between South Asian Cnemaspis species analysed in the study. Bold text indicates the p-distances between novel taxa and other valid and candidate taxa.
	Species	1	2	3	4	5	6	7	8	9	10	11	12	13	14	15	16	17	18	19	20	21	22	23	24	25	26	27	28	29	30	31	32	33	34	35	36	37	38	39	40	41	42	43	44	45	46	47	48
1	C. agarwali	−
2	C. ajijae	20.82	−
3	C. alwisi	28.78	28.3	−
4	C. amba	20.08	18.97	26.55	−
5	C. avasabinae	18.43	25.09	26.62	22.5	−
6	C. bangara	18.78	18.37	26.12	19.82	22.18	−
7	C. butewai	20.18	21.9	29.23	20.34	21.33	20.86	−
8	C. cf. flaviventralis	19.58	16.81	26.17	19.82	21.14	17.16	20.34	−
9	C. cf. gracilis	10.88	23.81	29.32	24.4	21.16	22.59	21.95	21.32	−
10	C. cf. mahabali	19.59	18.37	26.26	10.91	21.16	19.59	19.86	16.29	24.08	−
11	C. cf. gemunu	25.85	25.17	17.28	25.23	23.04	23.27	25.94	23.74	26.26	23.95	−
12	C. chengodumalaensis	30.07	30.61	28.64	28.5	30.72	28.16	29.98	28.94	31.29	29.39	28.3	−
13	C. gemunu	27.94	26.36	18.97	26.65	25.43	24.61	27.53	24.67	27.97	25.22	6.44	29.61	−
14	C. giri	19.86	17.41	25.37	12.07	20.82	19.18	20.41	18.37	22.86	9.66	23.67	27.89	25.22	−
15	C. goaensis	15.93	20.51	26.36	19.07	19.45	17.29	16.89	17.85	17.29	17.8	23.05	27.46	24.35	18.14	−
16	C. gotaimbarai	21.22	23.13	29.32	23.12	21.84	22.45	11.11	22.36	22.72	21.77	25.58	30.2	28.35	21.9	20.51	−
17	C. gracilis	9.39	21.09	29.32	21.18	19.8	19.32	20.41	20.8	13.74	20.41	26.94	30.07	28.72	20.27	15.76	21.22	−
18	C. gunasekarai	28.33	28.47	9.52	26.27	25.73	25.48	30.33	25.52	28.47	25.88	16.6	29.15	17.76	25.2	25.3	29.97	28.47	−
19	C. hitihamii	26.56	25.88	11.53	24.8	25.3	24.52	27.79	25.26	27.52	23.5	15.68	27.38	17.92	23.03	23.09	27.86	26.97	11.53	−
20	C. ingerorum	19.05	21.36	29.32	20.52	20.82	20.27	9.34	20.8	21.36	21.22	25.85	30.75	27.94	21.22	17.8	8.71	19.86	30.37	27.31	−
21	C. jayaweerai sp. nov.	28.71	26.39	13.95	27.38	26.79	26.26	29.3	26.17	28.16	27.76	18.64	30.75	20.64	26.53	26.61	29.8	27.89	14.83	13.5	29.52	−
22	C. kallima	18.1	21.63	27.41	20.01	17.75	18.91	7.57	19.93	21.22	20	23.81	29.25	26.58	19.59	15.93	9.25	18.37	28.74	26.5	6.67	27.35	−
23	C. kandiana	18.4	21.29	28.37	20.4	18.43	19.22	8.29	19.71	20.88	20.03	23.84	28.67	26.1	19.86	16.14	9.49	18.47	28.54	25.95	7.45	28.27	5.07	−
24	C. kivulegedarai	19.86	21.36	28.1	20.98	19.62	19.18	7.3	20.1	21.63	20.41	24.35	30.07	26.58	20.41	17.12	10.2	19.73	28.88	26.77	6.67	27.76	5.44	6.33	−
25	C. kohukumburai	30.43	30.02	12.7	27.32	26.05	27.3	30.2	27.15	31.25	27.03	17.23	30.98	18.38	25.67	25.76	29.8	30.98	12.22	13.48	30.2	16.33	28.48	28.63	29.57	−
26	C. koynaensis	19.8	17.48	25.88	12.23	21.5	19.12	19.77	18.46	23.27	10.88	23.88	30.61	25.23	7.82	18.64	21.84	20.61	26.29	22.76	20.88	26.46	19.05	19.63	20	26.21	−
27	C. krishnagiriensis	20.14	18.64	25.71	21.22	19.97	16.46	20.27	18.02	22.99	18.37	22.99	30.2	23.57	19.18	16.44	21.36	20.95	25.34	23.91	19.59	26.26	19.59	18.47	19.46	24.99	18.98	−
28	C. kumarasinghei	20.08	22.57	27.96	21.41	19.94	20.02	9.68	20.45	22.37	21.07	24.04	29.64	26.33	20.51	17.58	8.63	20.02	29.05	27.41	8.71	28.22	7.23	7.81	8.38	28.53	20.83	19.36	−
29	C. latha	19.32	20.82	28.5	19.89	18.43	20.14	8.39	20.28	20.82	20.27	24.9	29.8	27.4	19.05	16.78	10.07	19.05	30.24	26.9	7.89	28.03	6.12	7.72	4.22	29.16	19.05	19.32	9.1	−
30	C. limayei	24.93	22.75	30.25	16.73	25.3	22.89	25.3	23.22	28.07	16.49	26.98	31.61	29.28	18.53	22.41	27.11	25.34	30.14	28.2	25.2	29.43	24.66	25	24.11	30.34	19.21	25.34	25.42	24.66	−
31	C. lokugei	18.97	22.23	28.24	21.81	20.89	20.73	8.12	22.49	21.1	20.96	25.05	30.4	26.86	20.51	17.98	10.66	19.83	28.71	26.64	7.76	28.68	7.17	8.09	6.76	29.22	20.92	20.64	8.98	7.89	24.63	−
32	C. magnifica	31.29	32.11	31.43	29.63	32.76	30.2	31.97	29.81	32.93	31.29	30.75	10.75	31.47	30.61	28.31	32.52	30.75	31.19	30.31	32.93	31.97	31.84	31.33	31.97	32.47	33.33	30.48	32.4	32.11	31.2	32.3	−
33	C. modiglianii	18.64	21.36	28.64	20.26	19.8	19.46	10.57	21.14	20.82	20.54	25.03	29.39	26.58	20.68	16.95	11.29	18.5	29.97	26.5	8.44	27.89	6.39	7.48	8.03	30.11	20.2	20.82	9.64	8.3	25.34	9.3	31.7	−
34	C. molligodai	27.62	26.94	16.26	25.64	26.62	26.12	28.16	25.82	28.03	23.95	17.41	29.93	19.55	24.49	26.1	28.44	28.16	16.33	15	27.76	15.92	26.67	27.82	27.35	17.32	24.9	26.94	27.33	27.48	28.34	27.59	30.88	27.21	−
35	C. mysoriensis	24.22	28.3	31.29	25.95	19.28	26.53	26.58	27.21	25.58	27.35	27.48	32.52	29.57	26.67	22.54	26.8	25.58	30.92	29.52	26.39	31.84	23.95	23.44	24.63	30.43	25.99	26.26	25.38	24.08	29.56	25.91	33.2	25.71	29.12	−
36	C. nanayakkarai sp. nov.	28.71	28.03	8.98	26.14	27.65	25.85	31.16	26.86	28.84	25.71	17.55	30.34	18.32	25.44	25.76	30.34	28.98	10.2	12.89	30.2	15.37	28.71	29.25	29.52	13.65	25.37	26.26	29.87	29.8	30.25	29.95	32.11	29.93	17.55	31.43	−
37	C. nandimithrai	18.84	22.52	27.82	21.17	18.77	20.61	9.41	20.28	21.29	20.88	25.03	29.46	27.35	19.8	17.46	8.23	19.93	29.63	27.11	7.41	28.64	6.73	7.45	7.28	28.78	20.41	19.93	6.83	7.82	25.27	7.78	32.04	9.05	27.41	24.83	30.14	−
38	C. nilgala	27.76	27.76	13.67	27.84	26.11	25.31	28.66	24.44	27.89	27.35	17.01	30.34	19.48	26.39	25.59	28.3	28.71	13.88	12.35	28.71	13.2	28.44	27.14	27.35	14.92	26.46	25.71	27.66	28.16	31.2	26.72	32.24	28.71	17.01	30.88	15.37	27.82	−
39	C. pava	18.91	20.78	28.13	20.24	18.98	19.42	7.91	19.45	20.99	19.56	24.69	28.74	27.26	19.76	16.57	9.63	18.47	29.01	26.56	7.24	27.62	5.48	6	6.36	29.37	19.42	18.64	7.83	6.7	24.46	8.43	30.78	8.06	27.28	24.18	29.18	8.27	27.38	−
40	C. phillipsi	27.82	27.28	18.27	27.24	25.34	25.44	28.05	26.34	29.52	26.19	9.18	29.86	10.64	25.03	25.85	28.3	29.18	17.55	18.23	28.03	18.71	27.14	26.12	26.87	18.73	24.56	24.9	27.25	27.69	29.09	27.36	32.59	27.55	19.05	28.5	18.64	27.82	17.41	27.38	−
41	C. podihuna	27.24	27.21	16.72	25.39	25.43	25.31	28.08	25.82	27.96	25.27	17.55	30	19.16	24.63	25.81	28.88	28.23	17.11	15.92	27.38	17.28	26.39	26.73	26.53	17.6	24.83	26.43	27.28	27.04	28.17	26.93	31.43	26.67	12.18	29.63	17.93	26.97	16.73	27.48	17.69	−
42	C. pulchra	19.05	20.82	28.68	19.39	20.36	20.05	4.63	20.05	20.82	20.18	24.72	30.52	26.4	19.77	16.89	10.52	19.55	29.33	26.72	8.62	28.8	6.76	7.87	6.39	29.3	19.27	20.36	9.26	7.39	24.48	6.99	31.43	9.89	27.3	25.08	29.71	8.41	27.53	7.87	27.41	26.88	−
43	C. punctata	28.98	27.21	12.79	26.14	26.62	26.67	30.2	25.82	29.93	26.53	17.96	30.88	19.67	26.26	27.8	29.52	29.52	13.88	13.74	29.39	15.51	28.57	29.08	28.44	14.83	25.71	26.8	29.19	29.52	29.84	29.13	34.01	28.84	16.46	31.7	14.56	28.3	14.29	28.4	18.44	18.03	29.02	−
44	C. rajakarunai	27.14	27.28	18.13	26.46	25.6	26.36	26.32	25.83	26.59	26.59	16.74	29.94	18.8	25.03	22.62	26.27	28.11	17.58	17.02	26.36	17.7	24.67	25.38	25.08	18.43	25.38	25.26	25.05	25.63	29.02	25.41	30.99	25.58	16.42	28.98	19.35	25.01	18.52	25.34	20.43	17.34	25.58	19.12	−
45	C. rammalensis	26.35	26.27	14.63	26.57	25.59	25.47	28.42	25.88	27.93	25.3	17.53	29.95	19.96	24.7	25.21	27.67	28.08	15.91	14.77	28.14	17.01	26.27	26.9	27.07	17.34	24.6	25.06	27.11	27.25	29.31	26.5	31.36	27.21	15.44	29.34	16.59	26.79	16.12	27.69	18.77	16.45	27.61	16.76	12.94	−
46	C. retigalensis	19.59	21.63	28.78	21.39	19.28	19.32	9.84	20.1	22.18	20.54	24.76	29.93	27.53	20.27	17.29	11.16	18.91	29.29	26.77	8.57	28.57	5.71	6.84	7.48	29.57	20.14	20	8.61	9.12	24.52	8.53	31.29	8.3	27.89	25.58	30.48	9.05	28.57	7.69	27.96	27.82	8.84	29.93	26.45	27.9	−
47	C. rishivalleyensis	19.73	24.63	27.35	23.11	5.29	21.77	21.95	21.49	21.5	22.86	24.35	29.93	25.68	22.18	19.32	22.18	20	25.2	24.25	21.22	27.21	18.91	19.49	20.68	26.76	22.24	21.22	21.4	19.32	26.57	20.78	31.97	20.54	26.67	21.36	27.35	20.75	25.58	20	25.85	24.52	20.95	27.21	24.99	25.32	20.68	−
48	C. samanalensis	19.05	21.5	27.55	20.4	19.11	19.32	9.75	20.45	21.09	21.09	24.76	29.25	27.12	20.14	17.46	11.29	18.5	28.61	26.5	8.98	27.35	6.26	7.41	7.89	29.02	20.2	19.86	9	8.44	25.2	9.21	30.88	8.57	27.89	23.13	28.98	9.46	27.62	5.54	27.69	27.38	8.66	29.25	25.58	26.55	8.84	19.86	−
49	C. scalpensis	27.75	27.6	18.95	27.2	25.51	26.41	28.06	26	28.68	26.2	10.23	30.52	10.74	25.84	26.04	28.45	29.53	18.46	18.24	28.4	19.46	27.48	26.11	26.69	19.83	25.77	25.84	27.22	27.62	29.51	27.53	33.5	27.47	19.23	28.96	19.52	27.48	18.24	27.93	4.34	18.12	27.36	19.6	20.49	19.83	28.11	26.06	28.26
50	C. schalleri	17.41	20.68	28.1	18.85	18.6	20.41	10.84	19.06	19.86	19.59	23.4	29.52	25.9	19.46	15.08	12.93	19.05	28.2	25.68	11.56	28.57	9.8	10.31	10.75	28.39	18.78	19.05	11.95	10.75	24.93	11.21	30.88	11.16	26.39	24.22	29.52	10.82	28.03	11.77	26.94	27.18	9.89	29.66	25.4	26.58	12.11	19.73	11.84
51	C. shevaroyensis	7.35	21.36	29.8	20.89	19.45	18.78	20.59	20.8	12.38	20.41	25.99	30.48	28.56	20.68	16.44	21.77	9.93	28.88	26.43	20.14	27.89	18.91	18.67	20	31.11	20.48	21.36	20.19	19.73	24.93	19.37	31.7	18.91	27.35	24.9	29.52	19.93	28.16	19.63	28.78	26.8	19.64	29.93	26.73	27.14	19.73	19.59	19.86
52	C. silvula	19.18	21.9	28.44	20.08	19.97	20	10.02	21.84	19.86	20.41	25.71	29.25	27.67	20.27	16.78	9.52	19.73	29.29	26.5	5.71	28.57	7.21	7.65	7.62	29.8	20.07	19.73	8.84	8.44	24.66	8.8	31.84	8.98	27.62	25.31	29.12	7.28	27.62	8.27	27.28	26.77	8.93	28.98	26.13	27.68	9.12	20.54	9.12
53	C. stellapulvis	19.24	24.82	27.16	25.27	13.49	23.56	21.82	23.24	21.04	23.38	24.1	28.78	24.67	23.2	20.14	24.28	21.04	26.3	25.58	22.48	26.98	20.14	20.5	20.5	28	23.56	21.58	21.17	20.68	26.31	21.54	30.4	21.76	27.52	20.86	26.98	20.68	26.44	20.68	25.36	26.66	20.8	27.16	26.89	26.31	20.5	13.31	19.96
54	C. tanintharayi	18.91	21.22	27.69	21.15	19.97	20	9.52	20.97	20.54	20.41	25.31	28.98	27.8	19.86	16.78	11.84	18.5	29.42	26.63	8.98	28.03	7.48	8.81	8.16	29.43	20.14	20	9.78	8.44	24.93	8.98	31.84	6.94	26.8	25.17	29.39	10.14	29.12	8.27	28.44	26.97	9.57	29.52	25.77	27.27	9.66	20	9.52
55	C. thackerayi	13.06	21.5	27.14	18.58	17.06	18.91	17.78	19.24	15.78	18.5	24.49	28.84	24.48	18.5	13.9	19.59	13.47	26.09	25.31	17.41	27.76	17.28	16.84	17.28	26.62	18.98	18.23	18.06	17.14	24.11	17.38	30.75	17.28	27.21	22.45	26.67	17.21	26.94	17.01	25.92	26.5	16.64	27.89	25.54	27.84	18.1	17.96	17.41
56	C. thayawathadangyi	18.5	20.27	27.41	20.48	19.62	20.27	10.43	20.97	21.09	20.68	24.22	28.71	26.85	20.54	16.44	11.97	18.23	29.29	26.09	9.25	27.21	6.8	8.16	7.76	29.16	20.48	19.59	10.03	8.3	24.66	9.21	30.48	6.12	26.53	25.17	28.98	9.05	29.12	8.03	27.07	26.94	9.16	29.25	25.08	27.16	8.98	20.14	9.12
57	C. upendrai	18.74	20.75	27.07	19.84	18.34	18.27	8.39	18.63	20.51	19.08	23.81	28.95	26.17	19.49	16.36	10	18.37	28.06	25.51	7.79	26.87	5.34	6.26	6.19	28.31	18.67	19.29	7.55	7.28	24.01	8.42	30.92	7.35	26.6	23.78	28.37	8.44	26.8	3.67	26.53	26.87	7.64	27.45	25.06	26.55	7.52	19.83	5.24
58	C. yelagiriensis	20.14	18.64	26.53	21.58	20.99	16.87	19.77	18.72	22.45	19.32	23.67	28.57	24.94	19.32	16.78	22.45	20.41	25.95	24.86	20.95	26.67	20.41	19.32	20.41	25.8	19.18	7.62	20.35	20.68	25.48	20.24	28.98	21.22	26.67	26.94	27.07	20.75	25.85	19.66	25.31	26.7	20.41	26.8	24.94	25.85	20.41	21.09	20.54
59	C. yercaudensis	20.47	24.19	27.91	24.75	16.38	23.1	23.41	25.65	22.95	23.72	24.96	29.3	25.74	22.95	22.54	24.19	21.24	28.88	25.85	22.64	27.75	22.02	21.51	22.33	28.63	23.18	22.33	22.26	21.24	26.4	22.13	31.16	22.64	27.91	22.64	28.06	21.4	27.75	21.63	25.74	26.71	22.38	27.6	27.63	26.91	21.55	16.74	20.93
60	C. zacharayi	32.65	31.02	30.88	30.5	32.25	30.07	31.88	30.33	33.06	29.39	28.71	15.37	29.7	29.39	29.15	31.56	31.7	30.37	29.93	32.38	32.11	31.84	31.39	32.65	31.79	30.54	31.56	32.01	32.93	32.43	32.3	17.82	31.29	29.52	32.93	31.02	31.77	31.29	30.34	29.39	30.2	32.83	31.29	31.13	31.47	31.84	31.02	32.38
61	Cnemaspis sp.1	18.1	21.5	27.55	19.7	18.77	19.86	7.98	19.58	20.27	19.86	23.95	28.84	26.56	19.32	15.59	9.93	17.69	28.33	26.09	7.35	27.62	4.9	6.84	6.39	28.75	19.73	19.18	7.64	7.07	24.25	6.9	31.43	7.48	26.39	24.9	29.12	7.82	27.76	6.77	27.14	26.26	7.44	28.44	24.67	25.87	7.62	19.46	7.21
62	Cnemaspis sp.3	18.78	20.54	28.37	19.38	21.16	20.54	5.71	21.14	20.54	20	25.03	30.61	26.58	19.73	17.8	10.34	19.46	29.97	26.77	7.89	28.98	7.35	8.67	6.39	29.98	19.05	19.86	9.64	7.35	25.2	7.49	31.97	10.07	27.21	25.58	29.66	8.37	28.3	8.4	27.55	26.97	3.04	28.84	25.49	28.12	9.8	21.5	9.39
63	Cnemaspis sp.4	19.59	21.63	28.64	20.08	20.48	20.41	4.49	20.97	21.22	19.86	25.03	30.61	26.72	20.14	17.12	10.34	19.86	29.42	26.9	8.71	28.71	7.07	7.86	6.8	29.02	19.32	20.27	8.88	7.62	24.93	7.21	32.11	10.34	27.21	25.03	29.66	8.1	28.03	7.93	27.55	27.04	2.49	29.25	25.63	27.61	9.12	21.22	9.25
64	Cnemaspis sp.6	18.5	21.5	29.05	20.13	18.77	19.86	11.11	20.1	20.82	20.68	23.95	29.66	26.44	21.09	15.42	13.2	19.05	29.15	27.04	11.56	29.12	8.98	9.25	9.93	29.61	19.73	18.78	11.76	10.75	25.2	11.21	31.29	10.48	27.76	24.35	30.07	10.68	29.12	10.88	27.14	27.72	10.16	30.2	26.27	27.37	11.56	20.14	11.29
65	Cnemaspis sp.7	2.99	20.82	29.18	20.57	18.77	19.32	19.41	19.76	10.61	19.32	26.53	30.34	28.81	20	15.76	20.27	9.39	28.61	26.7	18.37	28.3	17.28	17.38	19.46	30.57	19.39	19.46	19.16	17.96	24.93	18.15	31.7	17.69	27.35	23.95	29.12	18.3	27.62	17.28	27.96	27.24	18.82	29.12	27.33	26.98	18.5	19.32	17.96
66	Cnemaspis sp.9	25.44	26.12	12.99	26.8	26.11	24.63	29.21	24.44	27.21	25.85	17.55	29.25	18.73	25.03	24.07	28.71	26.26	12.93	11.26	28.3	11.7	26.94	26.63	27.48	13.97	25.17	25.03	27.21	27.89	29.84	27.63	30.61	27.76	16.33	29.39	13.61	27.41	7.76	27.01	17.55	16.09	27.8	13.47	18.02	15.97	28.03	25.17	27.21
67	Cnemaspis sp.11	25.99	26.67	19.25	22.99	24.57	22.86	26.53	25.13	28.3	23.4	18.37	28.98	20.89	24.22	24.07	27.89	26.39	18.64	18.91	26.8	20.82	25.03	25.1	25.58	20.36	23.95	23.54	26.55	26.26	28.34	26.81	30.34	26.53	20.14	26.8	20.14	26.73	21.22	25.58	21.36	19.08	25.76	20.68	18.8	19.37	26.94	25.03	25.58
68	C. kandambyi	27.21	27.21	16.19	24.18	24.74	24.9	27.39	25.48	28.98	24.9	17.69	30.07	19.26	23.67	25.42	28.03	28.71	16.46	14.86	27.21	16.6	26.26	26.43	26.39	16.64	24.42	25.85	27.33	26.53	27.79	26.72	31.29	26.39	12.24	29.66	17.14	26.87	16.19	27.21	16.94	6.26	26.71	17.69	17.93	15.74	27.62	23.95	27.62
[truncated: 20 more columns]
